# Supplementary material for: SnO2/SnS2 heterojunction with mesoporous structure for improved photocatalytic degradation of sulfonamide antibiotics
Source: Research Square preprint supplement (doi:10.21203/rs.3.rs-5203581/v1), 2024-10-14

**SnO2/SnS2 heterojunction with mesoporous structure for improved photocatalytic degradation of sulfonamide antibiotics**

Zhanyu Li1, Pengyu Li1, Yike Fang1, bingxu Chen2, Danfeng He2, Wei Sun1, Guohui Li2*,Yuanyuan Sun1*

1 Hainan International Joint Research Center of Marine Advanced Photoelectric Functional Materials, Hainan Engineering Research Center of Tropical Ocean Advanced Optoelectronic Functional Materials, Key Laboratory of Laser Technology and Optoelectronic Functional Materials of Hainan Province, Key Laboratory of Functional Materials and Photoelectrochemistry of Haikou, College of Chemistry and Chemical Engineering, Hainan Normal University, Haikou 571158, China

2 School of Science, Qiongtai Normal University, Haikou 571127, China

*Corresponding author：Yuanyuan Sun, [sunyuanyuan@hainnu.ecu.cn](mailto:sunyuanyuan@hainnu.ecu.cn); Guohui Li, 98liguohui@163.com

**Graphical abstract**


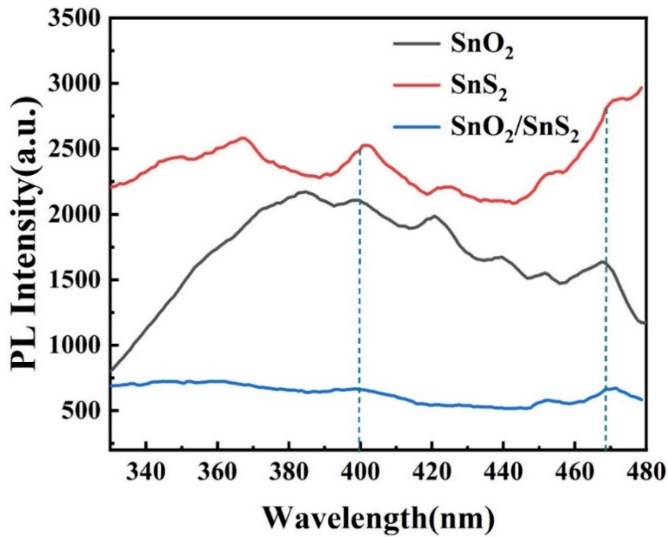

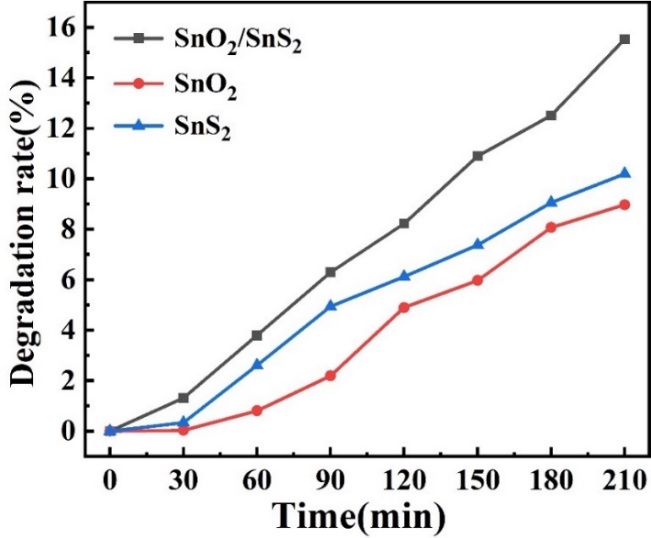

Supplement: Supplementary file 1 [file 3abb0af860d6e552481839c1.docx]
