# Supplementary material for: SnO2/SnS2 heterojunction with mesoporous structure for improved photocatalytic degradation of sulfonamide antibiotics
Source: Research Square preprint supplement (doi:10.21203/rs.3.rs-5203581/v1), 2024-10-14
Supplement: Supplementary file 2 [file 6f32afefb1d89ae158434569.docx]

**SnO2/SnS2 heterojunction with mesoporous structure for improved photocatalytic degradation of sulfonamide antibiotics**

Zhanyu Li1, Pengyu Li1, Yike Fang1, bingxu Chen2, Danfeng He2, Wei Sun1, Guohui Li2*,Yuanyuan Sun1*

1 Hainan International Joint Research Center of Marine Advanced Photoelectric Functional Materials, Hainan Engineering Research Center of Tropical Ocean Advanced Optoelectronic Functional Materials, Key Laboratory of Laser Technology and Optoelectronic Functional Materials of Hainan Province, Key Laboratory of Functional Materials and Photoelectrochemistry of Haikou, College of Chemistry and Chemical Engineering, Hainan Normal University, Haikou 571158, China

2 School of Science, Qiongtai Normal University, Haikou 571127, China

*Corresponding author：Yuanyuan Sun, [sunyuanyuan@hainnu.ecu.cn](mailto:sunyuanyuan@hainnu.ecu.cn); Guohui Li, 98liguohui@163.com

**Highlights**

► A strategy of constructing mesoporous structure and S-type heterojunction to design SnO2-based photocatalyst is proposed.

► SnO2/SnS2 with a tight heterojunction interface and abundant oxygen vacancies

► The degradation rate of SnO2/SnS2 was 1.7 times that of SnO2 and 1.5 times that of SnS2

►The zero-order reaction with the apparent activation energy of J·mol-1 are unveiled.
